# Supplementary material for: FAM83D promotes ovarian cancer progression and its potential application in diagnosis of invasive ovarian cancer
Source: PubMed Central journal article supplement (PMC6584551; doi:10.1111/jcmm.14360), 2019-04-30
Supplement: JCMM-23-4569-s001.pdf [file JCMM-23-4569-s001.pdf]

# Supplementary Figure 1

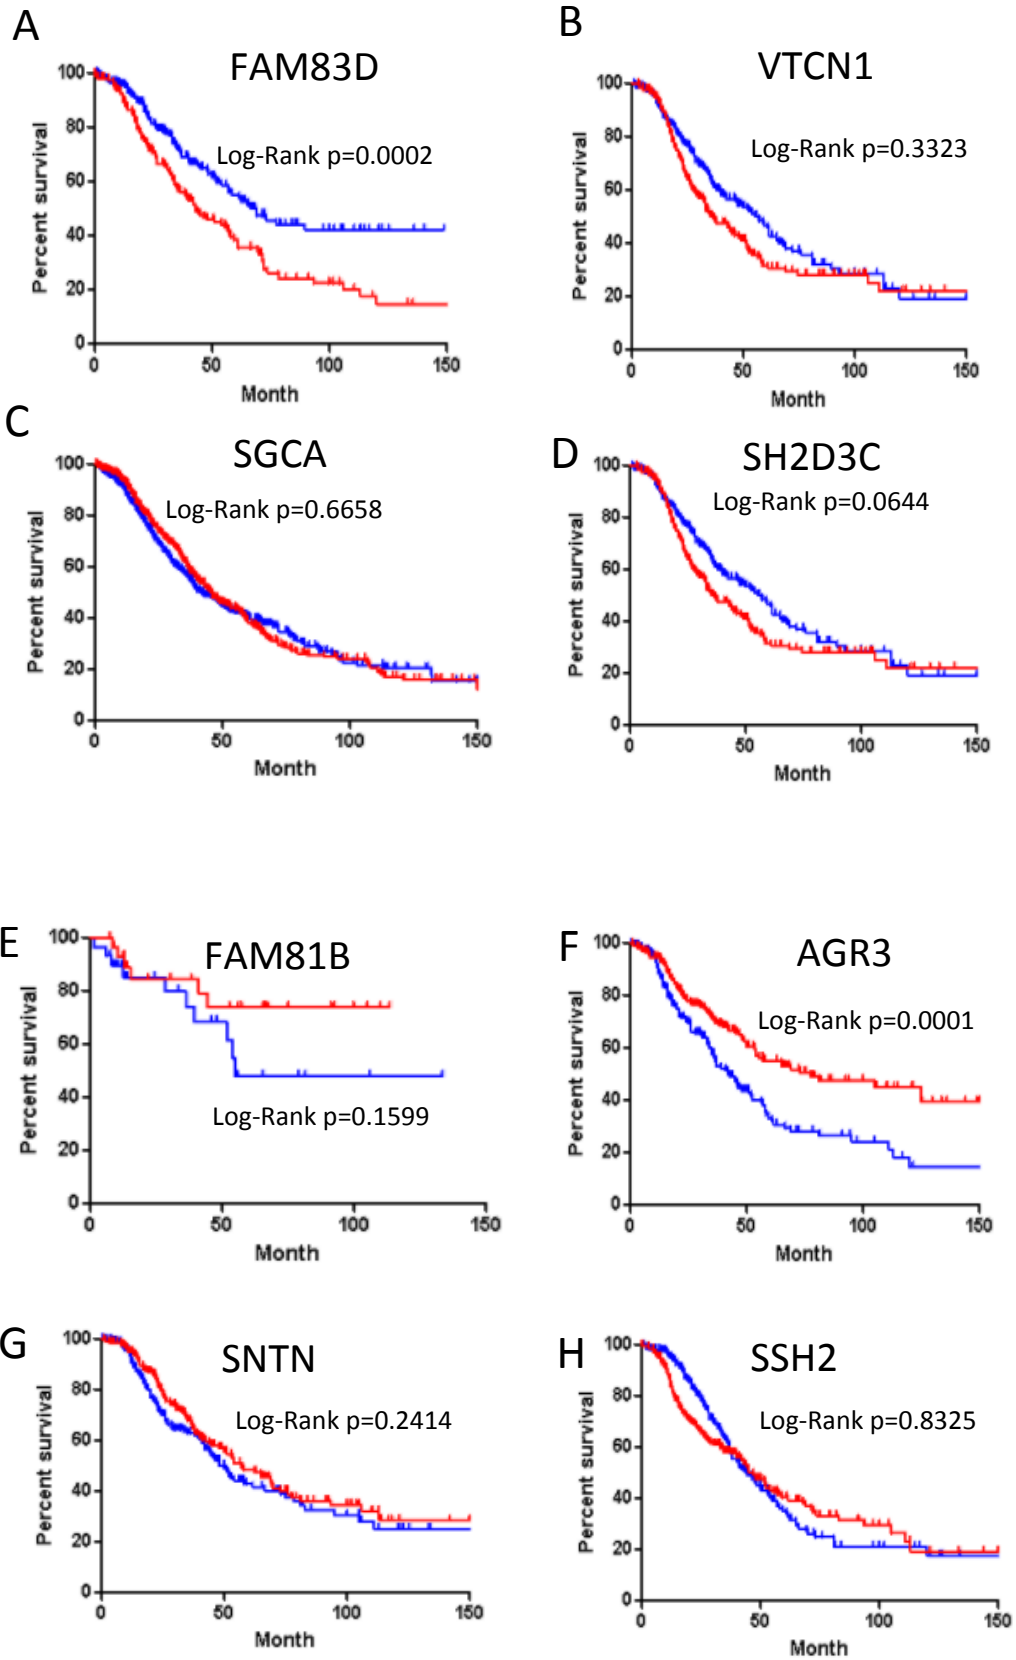

**Fig. S1.** Kaplan–Meier survival curves: Expression status of the investigated genes in patients with ovarian cancer.

## Supplementary Figure 2

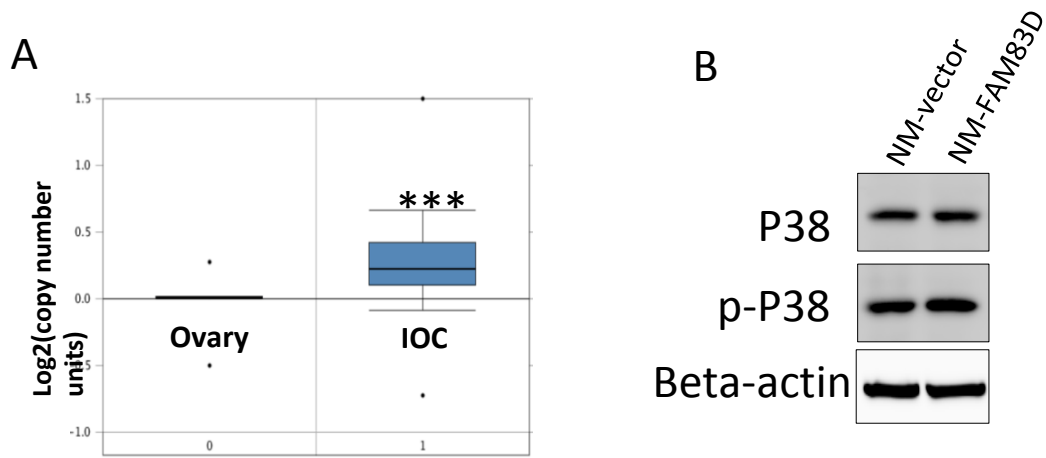

**Fig.S2. A.** Alterations in the gene copy number in IOC was evaluated using data from the Oncomine online database (<https://www.oncomine.org>). **B.** The protein levels of P38 and p-P38 in the NM-vector and NM-FAM83D cells were quantified using western blotting.
